# Supplementary material for: Topotactic conversion of calcium carbide to highly crystalline few-layer graphene in water
Source: Royal Society of Chemistry journal article supplement (doi:10.1039/c8ta08632j), 2018-01-01
Supplement: c8ta08632j1.pdf [file c8ta08632j1.pdf]

Supporting information

## **Topotactic Conversion of Calcium Carbide to High-Crystalline Few-Layer Graphene in Water**

Yin Jia,<sup>a,b</sup> Xiangchao Chen,<sup>c</sup> Guoxin Zhang,<sup>c,\*</sup> Lin Wang,<sup>a</sup> Cejun Hu,<sup>b</sup> and Xiaoming Sun<sup>a,b,c,\*</sup>

a. State Key Laboratory of Chemical Resource Engineering, Beijing Advanced Innovation Center of Soft Materials Science and Engineering, Beijing University of Chemical Technology, Beijing 100029, China

b. College of Energy, Beijing University of Chemical Technology, Beijing 100029, China

c. College of Electrical Engineering and Automation, Shandong University of Science and Technology, Qingdao 266590, China

\* Corresponding to Emails: zhanggx@sdust.edu.cn; sunxm@mail.buct.edu.cn

## Figures and caption

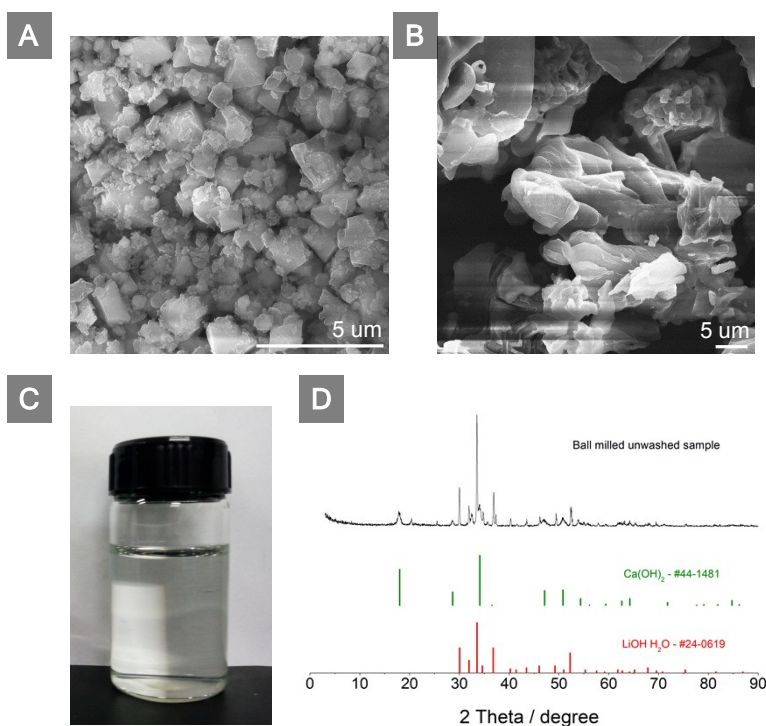

**Figure S1.** SEM images of ball-milled product of  $\text{CaC}_2/\text{LiOH}$  (A) before and (B) after acid washing. (C) Digital image of acid-washed ball-milled product of  $\text{CaC}_2/\text{LiOH}$ . (D) XRD profile of ball-milled product of  $\text{CaC}_2/\text{LiOH}$ .

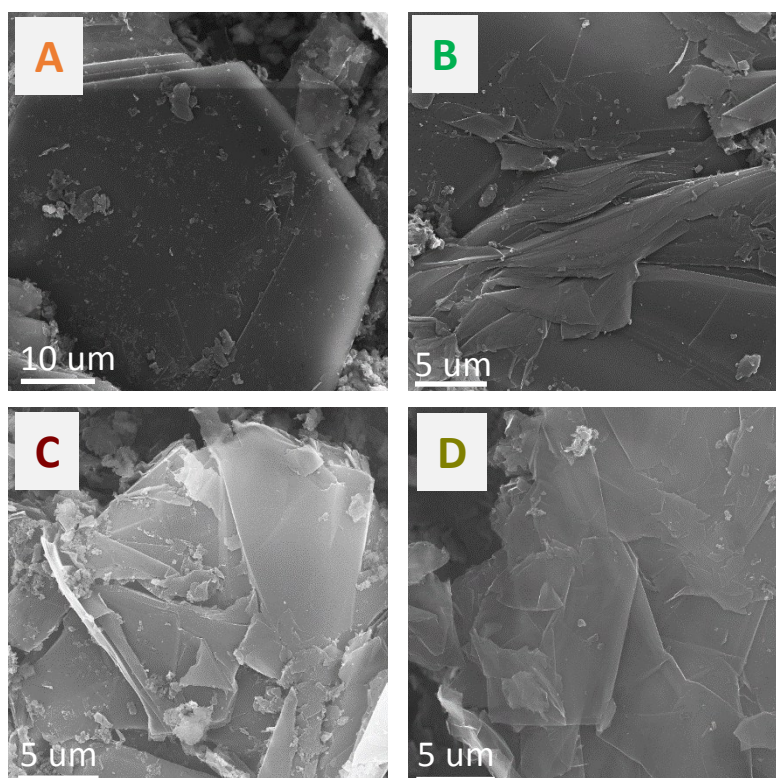

**Figure S2.** SEM images of graphene materials prepared using different H-containing solvent or solution: (A) diluted HCl solution, (B)  $\text{H}_2\text{O}$ , (C) acetic acid, and (D) ethylene glycol.

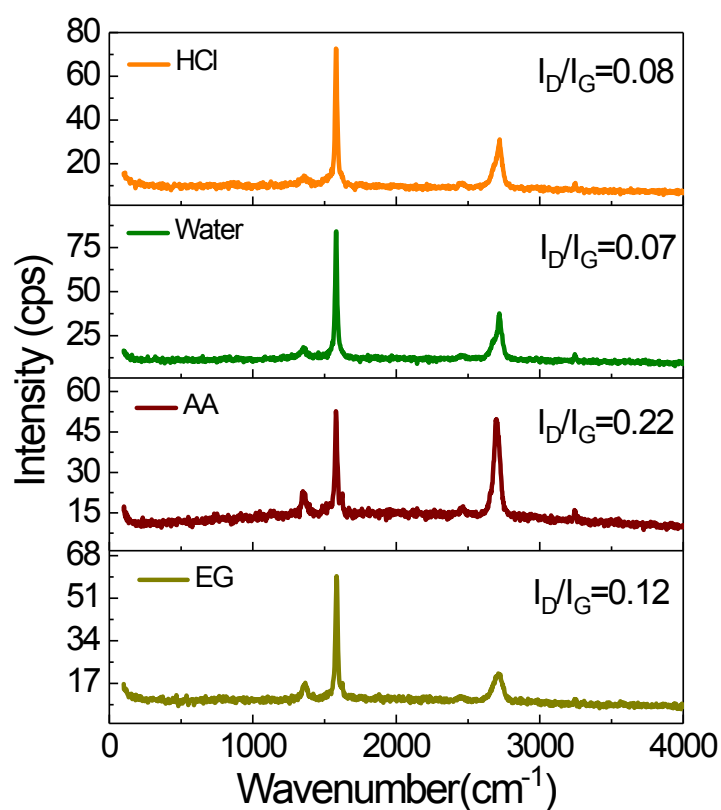

**Figure S3.** Raman spectra of graphene materials prepared using different H-containing solvent or solution: diluted HCl solution, H<sub>2</sub>O, acetic acid (AA), and ethylene glycol (EG).

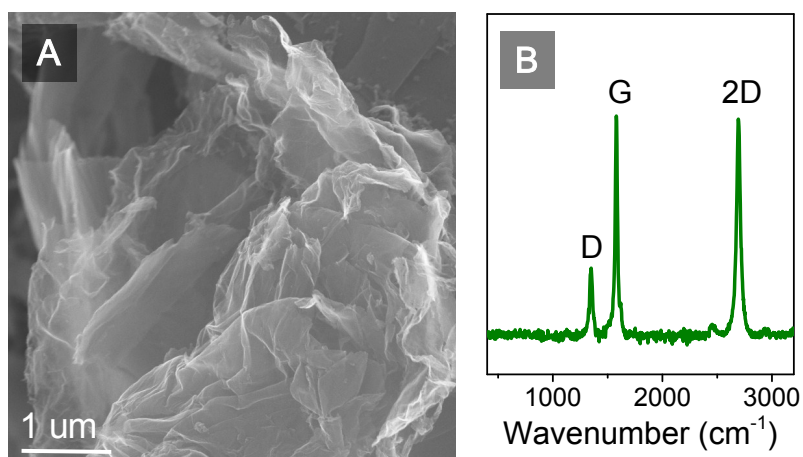

**Figure S4.** (A) SEM images of FLG after re-suspension and centrifugation. (B) Raman spectra of upper-layer FLG.

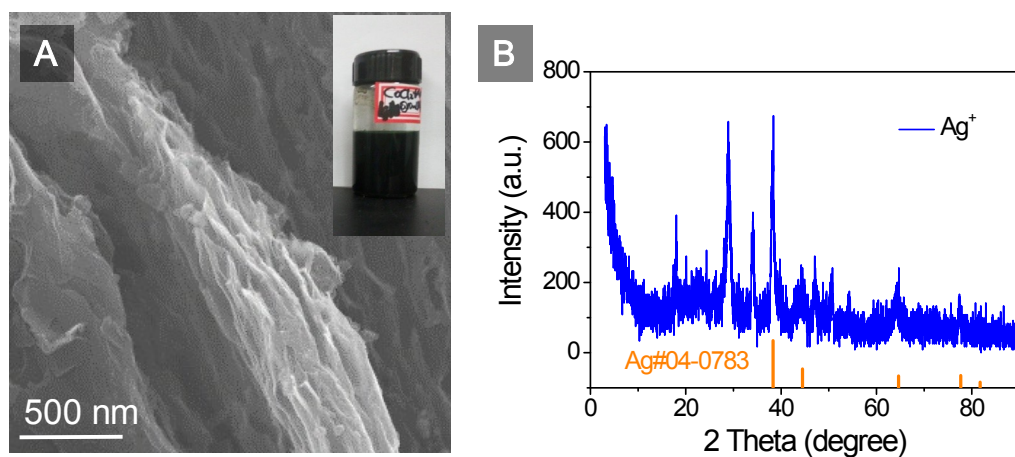

**Figure S5.** (A) SEM image and (B) XRD profile of Ag<sup>+</sup>-promoted synthesized FLG, inset of (A) shows the typical suspension after CaC<sub>2</sub> reacting with Ag<sup>+</sup> in DMF.

**Table S1.** Yields of few-layered graphene using different H-containing solvents or solution.

| Name            | Reaction rate | Yield (%) |
|-----------------|---------------|-----------|
| Diluted HCl     | Very fast     | 9.6       |
| Water           | Fast          | 9.7       |
| Acetic Acid     | Mediate       | 4.7       |
| Ethylene Glycol | Slow          | 0.16      |
